# Supplementary material for: Expanding the vision of entrepreneurial universities: a case study of UNIRIO in Brazil
Source: Springer Nature journal article supplement (doi:10.1186/s40604-016-0033-x), 2016-03-22
Supplement: MOESM1 [file 11901892]

## Expanding the vision of entrepreneurial universities: a case study of UNIRIO in Brazil

Mariza Almeida

توسيع نطاق رؤية الجامعة المقاولية: دراسة حالة UNIRIO في البرازيل

الكاتب (ة) : Mariza Almeida

### ملخص

الغاية من هذا المقال هي دراسة مجموعة من أنشطة المقاولات لإحدى الجامعات الحكومية والتفاعل مع الجامعات الأخرى. وقطاع الشركات وحكومة الجامعة الاتحادية لولاية ريو دي جانيرو (UNIRIO) في البرازيل. تهدف الدراسة إلى فهم ديناميكية ونتائج أنشطة البحث والتفاعل مع مختلف المنظمات وتحقيق التنمية المستدامة في المجالات التجارية والاجتماعية والثقافية والمدنية لروح المبادرة بواسطة استغلال دراسات فريق البحث Unirio. يمكن تحليل الأنشطة المرتبطة بروح المبادرة في مفهومها الشامل من إلقاء الضوء على جوانب لم تحظى بالاهتمام الكافي رغم أنها على نفس درجة أهمية أنشطة الجامعات والمتمثلة في المبادرات التي تركز على الأنشطة الاجتماعية والإنسانية. ترمى هذه الجهود بالتعاون مع باقي الأطراف إلى تسويق التكنولوجيا واعتماد المعرفة مما يمكن من خلق القيم الاجتماعية الضرورية للجامعة المقاولية.
